# Supplementary material
Source: Springer Nature journal article supplement (https://www.springermedizin.de/resource/supplementary/12936_2007_390_MOESM1_ESM.pdf/9547704)
Supplement: MOESM1 [file 9547704]

| <b>Source of anti-malaria</b> |            |              | <b>Inappropriate use</b> |             |               |
|-------------------------------|------------|--------------|--------------------------|-------------|---------------|
| <b>drug</b>                   | <b>n</b>   | <b>(%)</b>   | <b>n</b>                 | <b>%</b>    | <b>95% CI</b> |
| Licensed Chemical Shop        | 107        | (50)         | 92                       | (86)        | 79 - 93       |
| Pharmacy                      | 45         | (21)         | 24                       | (54)        | 39 - 69       |
| Other sources at home         | 42         | (20)         | 40                       | (95)        | 88 -100       |
| Neighbouring clinics          | 19         | (9)          | 7                        | (37)        | 15 - 59       |
| <b>Total</b>                  | <b>213</b> | <b>(100)</b> | <b>163</b>               | <b>(77)</b> |               |
